# Supplementary material
Source: PubMed Central journal article supplement (PMC4046193)
Supplement: Supp_Table1.pdf [file Supp_Table1.pdf]

## Supplementary Data

SUPPLEMENTARY TABLE S1. UNIVARIATE  
PREDICTORS OF ANEMIA AT 96 WEEKS

| N= 3580                                                         | <i>OR</i> | <i>95% CI</i> | <i>p-value</i> |
|-----------------------------------------------------------------|-----------|---------------|----------------|
| <b>Pre-ART</b>                                                  |           |               |                |
| Age group                                                       |           |               |                |
| Child                                                           | 0.43      | 0.31, 0.59    | <0.001         |
| Reproductive age                                                | 1.00      | —             | —              |
| Older adult                                                     | 1.09      | 0.73, 1.62    | 0.68           |
| Female                                                          | 1.86      | 1.50, 2.31    | <0.001         |
| Low BMI                                                         | 1.31      | 1.02, 1.66    | 0.03           |
| WHO Stage 3/4                                                   | 0.96      | 0.77, 1.21    | 0.76           |
| CD4 (cells/mm <sup>3</sup> )                                    |           |               |                |
| 350+                                                            | 0.30      | 0.16, 0.57    | <0.001         |
| 200–349                                                         | 0.38      | 0.21, 0.69    | 0.002          |
| 100–199                                                         | 1.00      | —             | —              |
| 0–99                                                            | 0.82      | 0.67, 1.00    | 0.05           |
| Anemia pre-ART                                                  | 3.52      | 2.87, 4.33    | <0.001         |
| Microcytosis                                                    | 2.48      | 2.02, 3.04    | <0.001         |
| <b>Week 96</b>                                                  |           |               |                |
| Low BMI                                                         | 3.07      | 2.16, 4.36    | <0.001         |
| CD4 change<br>(per 100 cells/mm <sup>3</sup> )<br>from baseline | 0.86      | 0.81, 0.91    | <0.001         |
| Microcytosis                                                    | 4.74      | 3.33, 6.75    | <0.001         |
| Zidovudine use                                                  | 1.43      | 1.11, 1.85    | 0.01           |
| Pregnancy                                                       | 3.42      | 2.01, 5.84    | <0.001         |
| Cotrimoxazole use                                               | 0.78      | 0.64, 0.94    | 0.01           |
| WHO stage 3/4 event                                             | 3.60      | 1.20, 10.78   | 0.02           |
